# Supplementary material for: Synthesis of 1T-MoSe2 ultrathin nanosheets with an expanded interlayer spacing of 1.17 nm for efficient hydrogen evolution reaction
Source: Royal Society of Chemistry journal article supplement (doi:10.1039/c6ta07020e), 2016-01-01
Supplement: c6ta07020e1.pdf [file c6ta07020e1.pdf]

## Electronic Supplementary Information (ESI)

### **Synthesis of 1T-MoSe<sub>2</sub> ultrathin nanosheets with an expanded interlayer spacing of 1.17 nm for efficient hydrogen evolution reaction**

Miao Jiang,<sup>a1</sup> Junjun Zhang,<sup>bc1</sup> Meihui Wu,<sup>a</sup> Wenjing Jian,<sup>a</sup> Hongtao Xue,<sup>b</sup> Tsz-Wai Ng,<sup>b</sup> Chun-Sing Lee\*<sup>b</sup> and Jun Xu\*<sup>a</sup>

<sup>a</sup>School of Electronic Science & Applied Physics, Hefei University of Technology, Hefei, 230009, People's Republic of China

<sup>b</sup>Center of Super-Diamond and Advanced Films (COSDAF), and Department of Physics and Materials Sciences, City University of Hong Kong, Hong Kong SAR, People's Republic of China

<sup>c</sup>Department of Materials Science and Engineering, South University of Science and Technology of China, Shenzhen, 518055, People's Republic of China

<sup>1</sup>The authors contributed equally.

\*Corresponding authors: [apjunxu@hfut.edu.cn](mailto:apjunxu@hfut.edu.cn) (J. Xu), [apcslee@cityu.edu.hk](mailto:apcslee@cityu.edu.hk) (C.-S. Lee)

## **Experimental**

### **Synthesis**

0.4 mmol of  $\text{MoCl}_5$  and 0.8 mmol of  $\text{SeO}_2$  powders were added into 25 mL of octylamine in a Teflon-lined autoclave (50 mL). After the solution was stirred for several minutes, the autoclave was sealed and kept in an oven at 180 °C for 6-12 h, and then cooled down to room temperature. The product was collected by centrifugation and washed with absolute ethanol and distilled water several times, and vacuum-dried. 2H-MoSe<sub>2</sub> was prepared by annealing the as-prepared sample at 300-400 °C in an Ar/H<sub>2</sub> (5% H<sub>2</sub>) flow.

### **Characterization**

Structures, morphologies and compositions of the samples were characterized with X-ray diffraction (XRD) (Rigaku D/MAX2500V, Cu K $\alpha$  radiation), scanning electron microscopy (SEM) (Philips XL30 FEG), transmission electron microscopy (TEM) (Philips CM 20 FEG or JEOL JEM-2100F, 200 kV), Raman spectroscopy (Lab RAM HR, 532 nm excitation), X-ray photoelectron spectroscopy (XPS) (VG ESCALAB 220i-XL, Al K $\alpha$ ), and thermogravimetric (TG) analysis (Mettler Toledo TGA-DSC-1).

### **Electrochemical Measurements**

Electrochemical measurement was performed in a standard three-electrode configuration on an electrochemical workstation (CHI 660E). The three-electrode configuration contains a glassy-carbon electrode with the MoSe<sub>2</sub>

electrocatalysts as the working electrode, a saturated calomel electrode (SCE) as the reference electrode, and a Pt foil as the counter electrode. Typically, 10 mg of the MoSe<sub>2</sub> electrocatalysts was added in a mixture of 1600  $\mu\text{L}$  of DI water, 400  $\mu\text{L}$  of ethanol, 160  $\mu\text{L}$  of Nafion solution (5 wt%). The mixture was vigorously sonicated for about 30 min to form a homogeneous ink solution. 5  $\mu\text{L}$  of the ink was loaded onto a glassy-carbon electrode with a diameter of 3 mm, and dried at room temperature. The loading density of the catalysts is about 0.32  $\text{mg cm}^{-2}$ . A 0.5 M H<sub>2</sub>SO<sub>4</sub> solution was used as electrolyte and degassed by bubbling pure N<sub>2</sub> for 30 min. Linear sweep voltammetry was carried out at an scan rate of 5  $\text{mV s}^{-1}$  for the polarization curves. All of the potentials were carefully calibrated to a reversible hydrogen electrode (RHE).

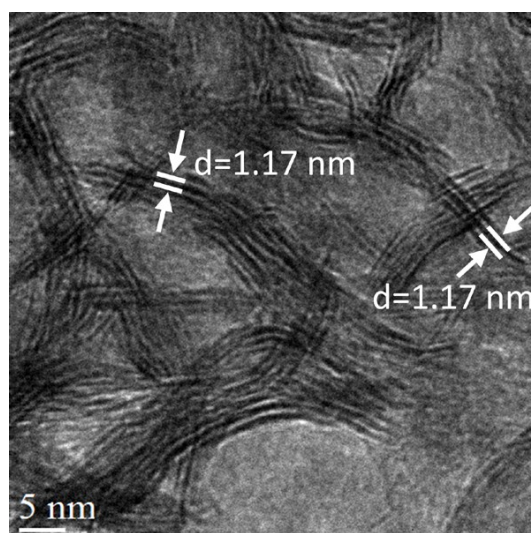

Fig. S1 HRTEM image of the as-prepared MoSe<sub>2</sub> flower-like assemblies in the internal area, showing that the nanosheets contain about 3-7 monolayers.

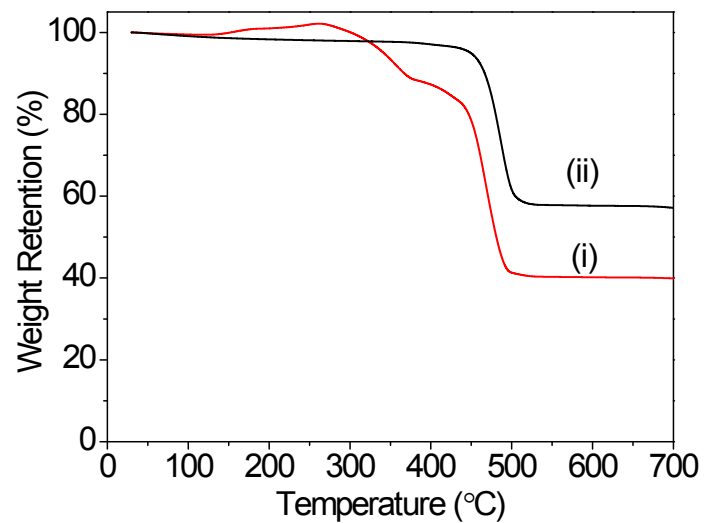

Fig. S2 TG analysis curves of (i) the as-prepared MoSe<sub>2</sub> sample and (ii) the MoSe<sub>2</sub> sample annealed at 300 °C. The larger weight loss in curve (i) is resulted from evaporation of octylamine molecules.

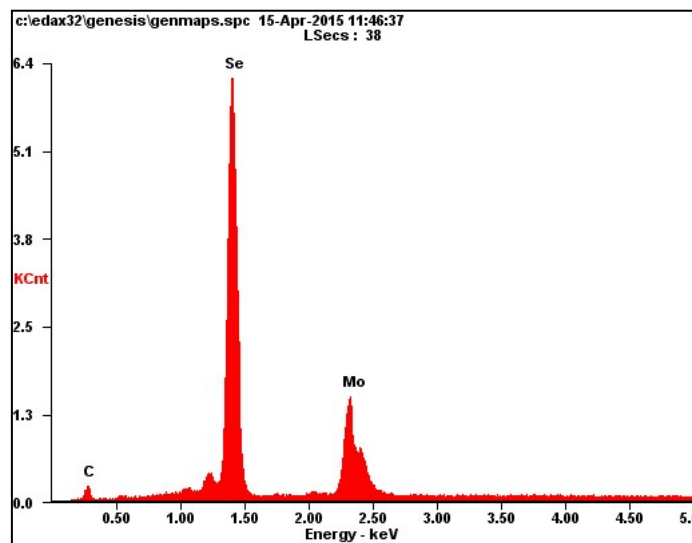

Fig. S3 EDX spectrum of the as-prepared MoSe<sub>2</sub> sample.

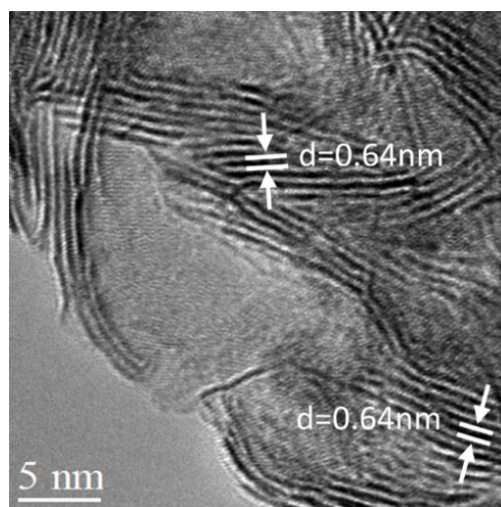

Fig. S4 HRTEM image of the MoSe<sub>2</sub> sample after annealing at 300 °C.

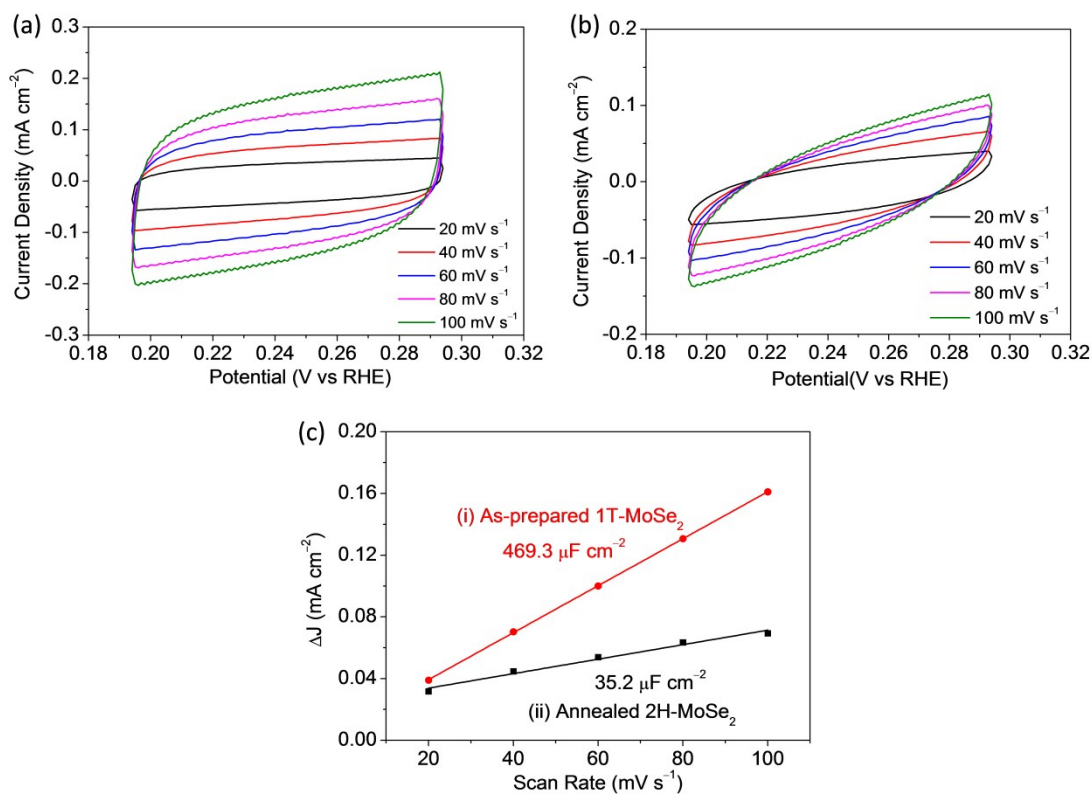

Fig. S5 (a) Cycling voltammetry (CV) curves of the as-prepared 1T-MoSe<sub>2</sub> electrocatalyst at scan rates from 20 to 100 mV s<sup>-1</sup> in the region of 0.194-0.294 V vs. RHE, (b) CV curves of the annealed 2H-MoSe<sub>2</sub> electrocatalyst at scan rates from 20 to 100 mV s<sup>-1</sup>, (c) The differences in current density variation ( $\Delta J = \frac{1}{2}(J_a - J_c)$ ) at 0.244 V vs. RHE plotted against scan rate fitted to a linear regression for estimation of  $C_{dl}$ .



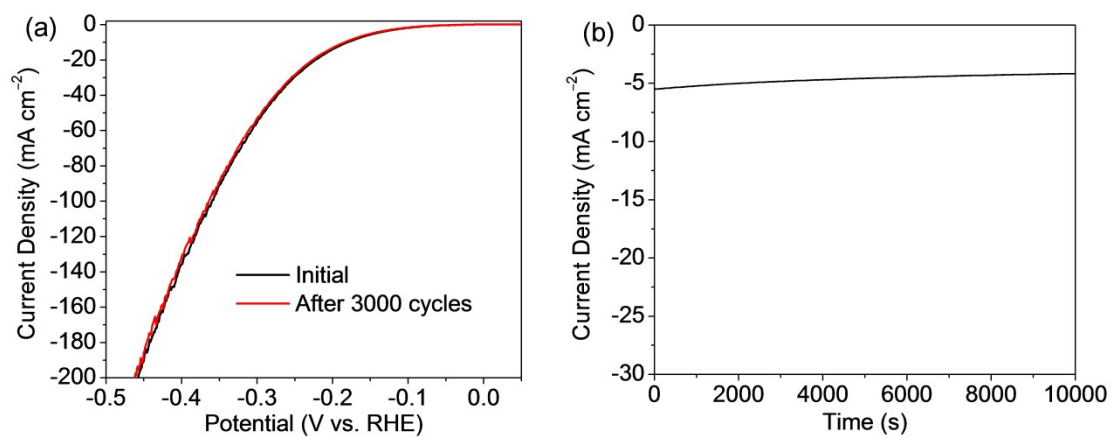

Fig. S6 (a) Polarization curves of the as-prepared 1T-MoSe<sub>2</sub> electrocatalyst, revealing that negligible degradation of HER activity after 3000 CV cycles. (b) Controlled potential electrolysis result of the as-prepared 1T-MoSe<sub>2</sub> sample at -0.20 V (vs RHE).

Table S1 Recent advance of HER performance of MoSe<sub>2</sub>-based catalysts.

| No. | Samples                                                             | Onset potential (V vs. RHE) | Tafel slope (mV per decade) | Overpotential at 10 mA cm <sup>-2</sup> (V vs. RHE) | References                              |
|-----|---------------------------------------------------------------------|-----------------------------|-----------------------------|-----------------------------------------------------|-----------------------------------------|
| 1   | Interlayer-expanded 1T-MoSe <sub>2</sub> nanosheets                 | 0.060                       | 78                          | 0.179                                               | This work                               |
| 2   | Exfoliated 1T-MoSe <sub>2</sub> nanosheets                          | ~0.2                        | 82                          | 0.350                                               | Chem. Commun., 2015, 51, 8450–8453      |
| 3   | MoSe <sub>2</sub> film with vertically aligned layers               | ~0.2                        | 105–120                     | NA                                                  | Nano Lett., 2013, 13, 1341–1347         |
| 4   | Hierarchical ultrathin MoSe <sub>2-x</sub> nanosheets               | 0.17                        | 98                          | ~0.28                                               | Nanoscale, 2014, 6, 11046–11051         |
| 5   | MoSe <sub>2</sub> nanosheets                                        | ~0.12                       | 45                          | 0.181                                               | ACS Catal., 2015, 5, 2213–2219          |
| 6   | MoSe <sub>2</sub> porous microspheres                               | 0.077                       | 56                          | ~0.125                                              | Nano Res., 2015, 8, 1108–1115           |
| 7   | Monolayered MoSe <sub>2</sub> nanosheets                            | ~0.2                        | 134                         | 0.303                                               | Nanoscale, 2015, 7, 10490–10497         |
| 8   | S-doped MoSe <sub>2</sub> nanosheets                                | 0.09                        | 60                          | ~0.10                                               | J. Mater. Chem. A, 2014, 2, 5597–5601   |
|     | Pure MoSe <sub>2</sub> nanosheets                                   | 0.2                         | 106                         | ~0.22                                               |                                         |
| 9   | S-doped MoSe <sub>2-x</sub> nanosheets                              | ~0.14                       | 68                          | ~0.21                                               | Inorg. Chem. Front., 2015, 2, 931–937   |
|     | S-doped MoSe <sub>2-x</sub> nanotubes                               | ~0.15                       | 91                          | ~0.23                                               |                                         |
|     | MoSe <sub>2</sub> nanocaterpillars                                  | ~0.18                       | 119                         | ~0.28                                               |                                         |
| 10  | MoSe <sub>2</sub> /rGO hybrid nanostructures                        | 0.125                       | 67                          | ~0.19                                               | J. Mater. Chem. A, 2015, 3, 19706–19710 |
|     | Pure MoSe <sub>2</sub> nanoflowers                                  | 0.223                       | 103                         | ~0.38                                               |                                         |
| 11  | MoSe <sub>2</sub> /graphene hybrid nanosheets                       | 0.05                        | 69                          | ~0.15                                               | J. Mater. Chem. A, 2014, 2, 360–364     |
|     | Pure MoSe <sub>2</sub> nanosheets                                   | 0.15                        | 101                         | ~0.28                                               |                                         |
| 12  | Vertical aligned MoSe <sub>2</sub> nanosheets on carbon fiber paper | ~0.16                       | 77.4                        | 0.25                                                | Nano Lett., 2013, 13, 3426–3433         |
| 13  | Epitaxial MoSe <sub>2</sub> -NiSe nanohybrids                       | 0.15                        | 56                          | 0.21                                                | Chem. Mater. 2016, 28, 1838–1846        |
|     | Pure MoSe <sub>2</sub> nanosheets                                   | 0.17                        | 95                          | ~0.28                                               |                                         |
| 14  | Few-layer MoSe <sub>2</sub> grown on SnO <sub>2</sub> nanotubes     | 0.11                        | 51                          | 0.174                                               | J. Mater. Chem. A, 2015, 3, 16263–16271 |
